# Supplementary material
Source: ML conference proceedings conference paper supplement (https://openaccess.thecvf.com/content/WACV_2020/html/Sun_TwoStreamVAN_Improving_Motion_WACV_2020_paper.html)
Supplement: Supplementary file 1 [file Sun_TwoStreamVAN_Improving_Motion_WACV_2020_supplemental.pdf]

Archive with 7 entries (4 files):
- 0254-supp/
- 0254-supp/0254-supp.pdf
- __MACOSX/
- __MACOSX/0254-supp/
- __MACOSX/0254-supp/._0254-supp.pdf
- 0254-supp/0254-supp.mp4
- __MACOSX/0254-supp/._0254-supp.mp4
