# Supplementary material
Source: ML conference proceedings conference paper supplement (https://openaccess.thecvf.com/content/WACV_2020/html/Sun_TwoStreamVAN_Improving_Motion_WACV_2020_paper.html)
Supplement: Supplementary file 1 [file Sun_TwoStreamVAN_Improving_Motion_WACV_2020_supplemental.pdf › 0254-supp/0254-supp.pdf]

# TwoStreamVAN: Improving Motion Modeling in Video Generation

## A. Implementation Details

We implement our model using PyTorch [10]. We use Xavier initialization [3] for each layer and use the Adam optimizer [7] with initial learning rate  $\alpha = 2 \times 10^{-4}$ , first decay rate  $\beta_1 = 0.5$  and second decay rate  $\beta_2 = 0.999$ . We train our model for a total of 500K iterations with batch size 16 which takes 2 days on a TITAN V GPU to finish, and the ratio between Content and Motion Learnings is 3:2. To generate more complicated content in Syn-Action and Datasets, we pre-train the Content Stream for 300K iterations by the image reconstruction task. At the test time, we heat up the network for two time steps before generating videos on each dataset.

Inspired by the curriculum learning approach [2] and the scheduled sampling mechanism [2], we design the motion learning as follows. We introduce a very simple learning task at a very early stage, where the Motion Stream is trained to predict the next frame solely from the current frame with no need of modeling the history. This task is gradually replaced by the sequence training task using the scheduled sampling strategy such that at the beginning the model is trained for one-step prediction providing the entire history, while by the end of training the model is fully auto-regressive.

### A.1. Model Architecture

We provide the detailed model architecture of the Content Stream (the Content Encoder  $E_c$ , the Content Generator  $G_c$  and the Image Discriminator  $D_I$ ) in Table. 1 and the Motion Stream (the Motion Encoder  $E_m$ , the Motion Generator  $G_m$ , the Video Discriminator  $D_V$ ) in Table. 2. In  $E_c$  and  $G_c$ , we do not apply the Batch Normalization [6] after each convolutional layer to stabilize the content generation. For each scale  $s$  in the Motion Stream, we design a small subnet (Fig. 1) to generate adaptive convolution kernels  $w^s$  and  $M^s$  from a fraction of the motion feature map  $h_m$ . The weights of the subnet are not shared by different scales. Additionally, we generate  $w^s$  from two separate 1D kernels  $w_h^s$  and  $w_v^s$  as in [9]. Our implementation will be available.

### A.2. Hyper-Parameter Setting

We provide hyper-parameters of loss functions and model architecture for Weizmann Human Action [4],

| layer                     | configuration                              |
|---------------------------|--------------------------------------------|
| Content Encoder $E_c$     |                                            |
| 1                         | Conv2D ( $ngf$ , 3, 2, 1), ReLU            |
| 2                         | Conv2D ( $ngf$ , 3, 1, 1), ReLU            |
| 3                         | Conv2D ( $2xngf$ , 3, 2, 1), ReLU          |
| 4                         | Conv2D ( $2xngf$ , 3, 1, 1), ReLU          |
| 5                         | Conv2D ( $ngf$ , 3, 2, 1), ReLU            |
| 6                         | FC ( $32xngf$ ), ReLU, FC( $2xC$ )         |
| Content Generator $G_c$   |                                            |
| 1                         | FC( $32xngf$ ), ReLU, FC( $64xngf$ ), ReLU |
| 2                         | Deconv2D ( $8xngf$ , 3, 2, 1), ReLU        |
| 3                         | Deconv2D ( $4xngf$ , 3, 1, 1), ReLU        |
| 4                         | Deconv2D ( $2xngf$ , 3, 2, 1), ReLU        |
| 5                         | Deconv2D ( $2xngf$ , 3, 1, 1), ReLU        |
| 6                         | Deconv2D ( $ngf$ , 3, 2, 1), ReLU          |
| 7                         | Deconv2D (3, 3, 2, 1), Tanh                |
| Image Discriminator $D_I$ |                                            |
| 1                         | Conv2D (16, 4, 2, 1), LeakyReLU            |
| 2                         | Conv2D (32, 4, 2, 1), BN, LeakyReLU        |
| 3                         | Conv2D (64, 4, 2, 1), BN, LeakyReLU        |
| 4                         | Conv2D (1, 4, 2, 1), Sigmoid               |

Table 1: Model Architecture of the Content Stream. For each convolution layer, we list the output dimension, kernel size, stride, and padding. For the fully-connected layer, we provide the output dimension. ‘ $ngf$ ’ is the basic output dimension, which is a hyper-parameter in the model architecture.  $C$  is the dimension of the content latent space.

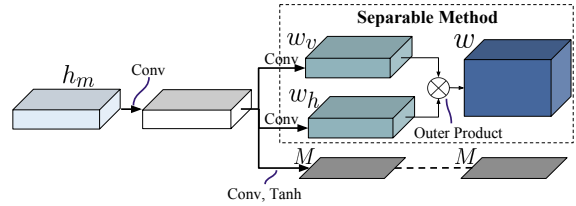

Figure 1: We design a subnet to generate motion kernels  $w$  and the motion mask  $M$  at each scale.  $h_m$  is a fraction of motion feature map which is used to generate  $w$  and  $M$ . In the separable method, a 2D kernel  $w(a, b)$  is approximated by the outer-product of two 1D kernels:  $w_v(a, b)$  and  $w_h(a, b)$ . This subnet contains three convolutional branches to generate  $w_v$ ,  $w_h$  and  $M$  respectively.

| layer                   | configuration                                        |
|-------------------------|------------------------------------------------------|
| Motion Encoder          |                                                      |
| 1                       | Conv2D ( $ngf$ , 5, 1, 2), BN, ReLU                  |
| 2                       | Conv2D ( $ngf$ , 5, 1, 2), BN, ReLU, MaxPool         |
| 3                       | Conv2D ( $2xngf$ , 5, 1, 2), BN, ReLU                |
| 4                       | Conv2D ( $2xngf$ , 5, 1, 2), BN, ReLU, MaxPool       |
| 5                       | Conv2D ( $2xngf$ , 7, 1, 3), BN, ReLU                |
| 6                       | Conv2D ( $ngf$ , 7, 1, 3), BN, ReLU, MaxPool         |
| 7                       | FC (512), ReLU, FC( $2xM$ )                          |
| Motion Generator        |                                                      |
| 0                       | FC(1024), ReLU                                       |
| 1                       | Deconv2D (128, 3, 1, 1), BN, ReLU                    |
| 2                       | Conv2D (128, 3, 1, 1), BN, ReLU                      |
| 3                       | Deconv2D (64, 4, 2, 1), BN, ReLU                     |
| 4                       | Conv2D (64, 3, 1, 1), BN, ReLU                       |
| 5                       | Deconv2D (32, 4, 2, 1), BN, ReLU                     |
| 6                       | Conv2D (32, 3, 1, 1), BN, ReLU                       |
| 7                       | Deconv2D (16, 4, 2, 1), BN, ReLU                     |
| 8                       | Conv2D (16, 3, 1, 1), BN, ReLU                       |
| Motion Generator-Subnet |                                                      |
| 1                       | Deconv2D (16, 3, 1, 1), BN, ReLU                     |
| 2-1                     | Conv2D (5, 3, 1, 1)                                  |
| 2-2                     | Conv2D (5, 3, 1, 1)                                  |
| 2-3                     | Conv2D (1, 3, 1, 1), Tanh                            |
| Video Discriminator     |                                                      |
| 1                       | Conv3D (64, 4, (1, 2, 2), (0, 1, 1)), LeakyReLU      |
| 2                       | Conv3D (128, 4, (1, 2, 2), (0, 1, 1)), BN, LeakyReLU |
| 3                       | conv3D (256, 4, (1, 2, 2), (1, 1, 1)), BN, LeakyReLU |
| 4                       | Conv2D (512, 4, (1, 2, 2), (1, 1, 1)), BN, LeakyReLU |
| 5                       | Conv2D (512, 4, (1, 2, 2), (0, 1, 1))                |

Table 2: Model Architecture of the Motion Stream. For each convolution layer, we list the output dimension, kernel size, strides, and padding. For each fully-connected layer, we provide the output dimension. ‘ $ngf$ ’ is the basic output dimension, which is a hyper-parameter in the model architecture.  $M$  is the dimension of the motion latent space.

MUG Facial Expression [1], VoxCeleb [8] and Syn-Action Datasets (Table. 3). Since we adopt the scheduled sampling mechanism in the Motion Learning, we slowly increase  $\lambda_6$  along with the process of the scheduled sampling, to restrict the KL divergence between the approximated latent distribution  $q(\mathbf{z}_m|\Delta x, k)$  and the real latent distribution  $p(\mathbf{z}_m|k)$  within a reasonable range. This helps to stabilize the motion sampling at the test time. We tune hyperparameters via validation: choose the best metrics computed from a group of generated videos. Note that the metrics reported in the paper are computed from another group of generated videos. We fix  $\lambda_1$ ,  $\lambda_3$  and  $\lambda_4$ , and sweep  $\lambda_2$  in [3, 8], ‘ $ngf$ ’ from {16, 32, 64},  $C$  from {256, 512, 1024} lower bound of  $\lambda_5$  in [1, 10] and higher bound from 5 to 10 times of its lower bound.

|           | Content Loss |             | Motion Loss |             |                    | Model Arch |      |     |
|-----------|--------------|-------------|-------------|-------------|--------------------|------------|------|-----|
| Params    | $\lambda_1$  | $\lambda_2$ | $\lambda_3$ | $\lambda_4$ | $\lambda_5$        | $ngf$      | $C$  | $M$ |
| Weizmann  | $10^4$       | 7           | $10^2$      | $10^4$      | $2 \rightarrow 20$ | 16         | 512  | 64  |
| MUG       | $10^4$       | 5           | $10^2$      | $10^4$      | $5 \rightarrow 25$ | 16         | 512  | 64  |
| SynAction | $10^4$       | 7           | $10^2$      | $10^4$      | $2 \rightarrow 20$ | 32         | 1024 | 64  |
| VoxCeleb  | $10^4$       | 6           | $10^2$      | $10^4$      | $5 \rightarrow 25$ | 64         | 512  | 64  |

Table 3: Hyper-Parameters for Weizmann Human Action, MUG Facial Expression, SynAction and VoxCeleb Datasets

## B. Details of Experimental Setup

### B.1. Data Splitting and Pre-processing

We use three datasets to evaluate our model and other baselines: Weizmann Human Action [4], MUG Facial Expression [1] and Syn-Action datasets.

**Weizmann Human Action.** Following [5], We use the first 2/3 for the training and save the last 1/3 for the test.

**MUG Facial Expression.** We use 4/5 of the entire dataset for the training and save 1/5 for the test.

**SynAction Dataset.** We use 14/15 of the whole dataset for the training and save 1/15 for the test.

**VoxCeleb Dataset.** We form the train set with 15184 videos of 186 people speaking. No test set is needed.

On all datasets, we crop the video centered at the actor or the face. To augment data, we further crop the video with a random small offset before down-sampling each frame to  $64 \times 64$  at each iteration. We adjust the frame sampling rate based on action types to make motion observable between adjacent frames.

### B.2. Definition of Evaluation Metrics

Let  $v$  be the generated video and  $y$  be the label for  $v$ , which is assigned by the pre-train classifier. We introduce definitions of Inter-Entropy  $H(y)$ , Intra-Entropy  $H(y|v)$  and Inception Score (IS) and explain how they measure the diversity and realism of generative models.

**Inter-Entropy**  $H(y)$  is the entropy of the marginal distribution  $p(y)$  obtained from all videos:

$$H(y) = - \sum_y p(y) \log p(y), \quad (1)$$

$$p(y) \approx \frac{1}{N} \sum_{i=1}^N p(y|v_i). \quad (2)$$

If all classes are equally represented in the generated samples,  $H(y)$  achieves its maximum value. Therefore, higher  $H(y)$  indicates the model generates more diverse results.

**Intra-Entropy**  $H(y|v)$  is the entropy of the conditional class distribution  $p(y|v)$  of a single video  $v$ :

$$H(y|v) = - \sum_y p(y|v) \log p(y|v), \quad (3)$$

More confident the classifier is to predict its class, lower  $H(y|v)$  is, and thus more realistic the video is. In this paper, we report the average  $H(y|v)$  to evaluate the overall realism of the generated videos.

**Inception Score (IS)** is widely adopted to evaluate generative models. In video-level task, it measures the KL divergence between the conditional label distribution  $p(y|v)$  and the marginal distribution  $p(y)$ :

$$\begin{aligned} \text{IS} &= \exp \left( \mathbb{E}_v [\text{KL}(p(y|v) || p(y))] \right) \\ &= \exp \left( H(y) - \mathbb{E}_v [H(y|v)] \right). \end{aligned} \quad (4)$$

Inception Score favors a higher  $H(y)$  and a lower  $H(y|v)$ . So it measures both the realism and diversity of the generated videos.

### B.3. Details of User Study

To conduct the user study on SynAction and VoxCeleb datasets, we pairwise compare 2000 random pairs via Amazon MTurk. Users are asked to choose a better looking one from a pair. For action-conditioned generation, users are further informed with the action label and re-make the choice. We calculate the percentage of user preference and bootstrap the variance.

## C. More Visualization Results

In this section, we provide more qualitative visualizations of generated videos from TwoStreamVAN and MoCoGAN [11] on each dataset (Fig. 2 for Weizmann Human Action [4], Fig. 3 for MUG Facial Expression [1], Fig. 4 & 5 for our SynAction Dataset and Fig. 6 for VoxCeleb [8]). On Weizmann, MUG and SynAction Datasets, We provide 2 videos as examples for each action class: videos from TwoStreamVAN and MoCoGAN are generated with the given class. On VoxCeleb, we provide 20 videos from TwoStreamVAN and MoCoGAN respectively. Due to the fine-grained motion included, we recommend readers to view the video version of this visual comparison in the supplementary material.

## References

- [1] N. Aifanti, C. Papachristou, and A. Delopoulos. The mug facial expression database. In *Image analysis for multimedia interactive services (WIAMIS), 2010 11th international workshop on*, pages 1–4. IEEE, 2010. 2, 3
- [2] S. Bengio, O. Vinyals, N. Jaitly, and N. Shazeer. Scheduled sampling for sequence prediction with recurrent neural networks. In *Advances in Neural Information Processing Systems*, pages 1171–1179, 2015. 1
- [3] X. Glorot and Y. Bengio. Understanding the difficulty of training deep feedforward neural networks. In *Proceedings of the thirteenth international conference on artificial intelligence and statistics*, pages 249–256, 2010. 1
- [4] L. Gorelick, M. Blank, E. Shechtman, M. Irani, and R. Basri. Actions as space-time shapes. *Transactions on Pattern Analysis and Machine Intelligence*, 29(12):2247–2253, December 2007. 1, 2, 3
- [5] J. He, A. Lehrmann, J. Marino, G. Mori, and L. Sigal. Probabilistic video generation using holistic attribute control. *European Conference on Computer Vision*, 2018. 2
- [6] S. Ioffe and C. Szegedy. Batch normalization: Accelerating deep network training by reducing internal covariate shift. *International Conference on Learning Representations*, 2015. 1
- [7] D. P. Kingma and J. Ba. Adam: A method for stochastic optimization. *International Conference on Learning Representations*, 2015. 1
- [8] A. Nagrani, J. S. Chung, and A. Zisserman. Voxceleb: a large-scale speaker identification dataset. In *INTERSPEECH*, 2017. 2, 3
- [9] S. Niklaus, L. Mai, and F. Liu. Video frame interpolation via adaptive separable convolution. In *IEEE International Conference on Computer Vision*, 2017. 1
- [10] A. Paszke, S. Gross, S. Chintala, G. Chanan, E. Yang, Z. DeVito, Z. Lin, A. Desmaison, L. Antiga, and A. Lerer. Automatic differentiation in pytorch. In *NIPS-W*, 2017. 1
- [11] S. Tulyakov, M.-Y. Liu, X. Yang, and J. Kautz. MocoGAN: Decomposing motion and content for video generation. *IEEE Conference on Computer Vision and Pattern Recognition (CVPR)*, 2018. 3

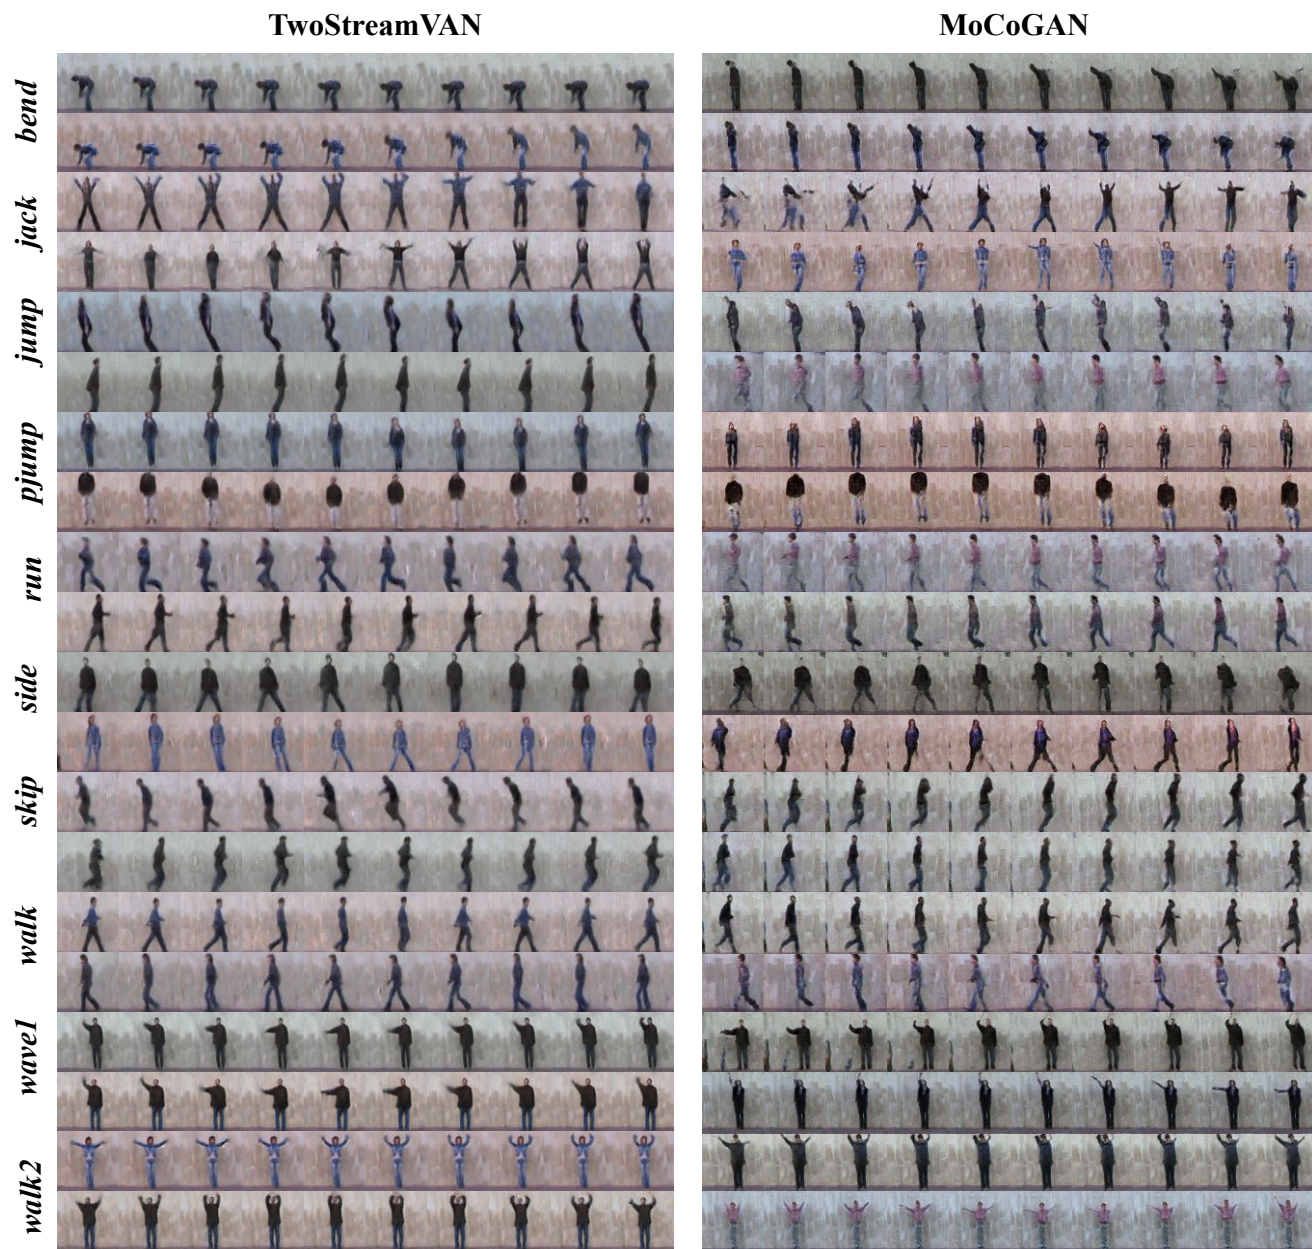

(a) Generated Videos from TwoStreamVAN and MoCoGAN

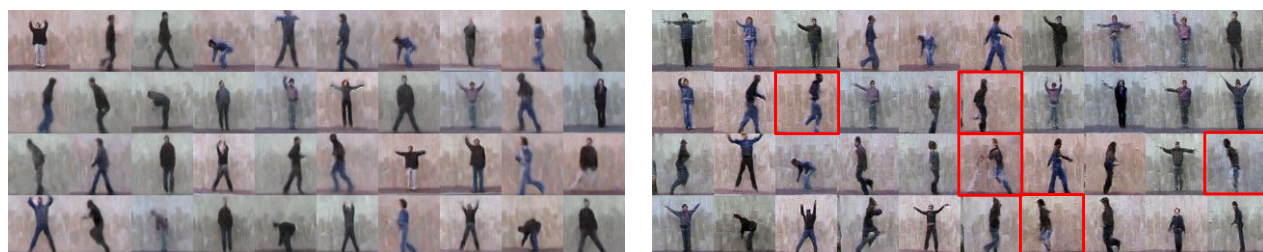

(b) Random Frames from TwoStreamVAN and MoCoGAN

Figure 2: We provide 2 videos of one action class generated by TwoStreamVAN and MoCoGAN respectively on Weizmann Human Action Dataset. Also, we randomly sample 40 frames to show the content quality. We mark frames with large distortion in red.

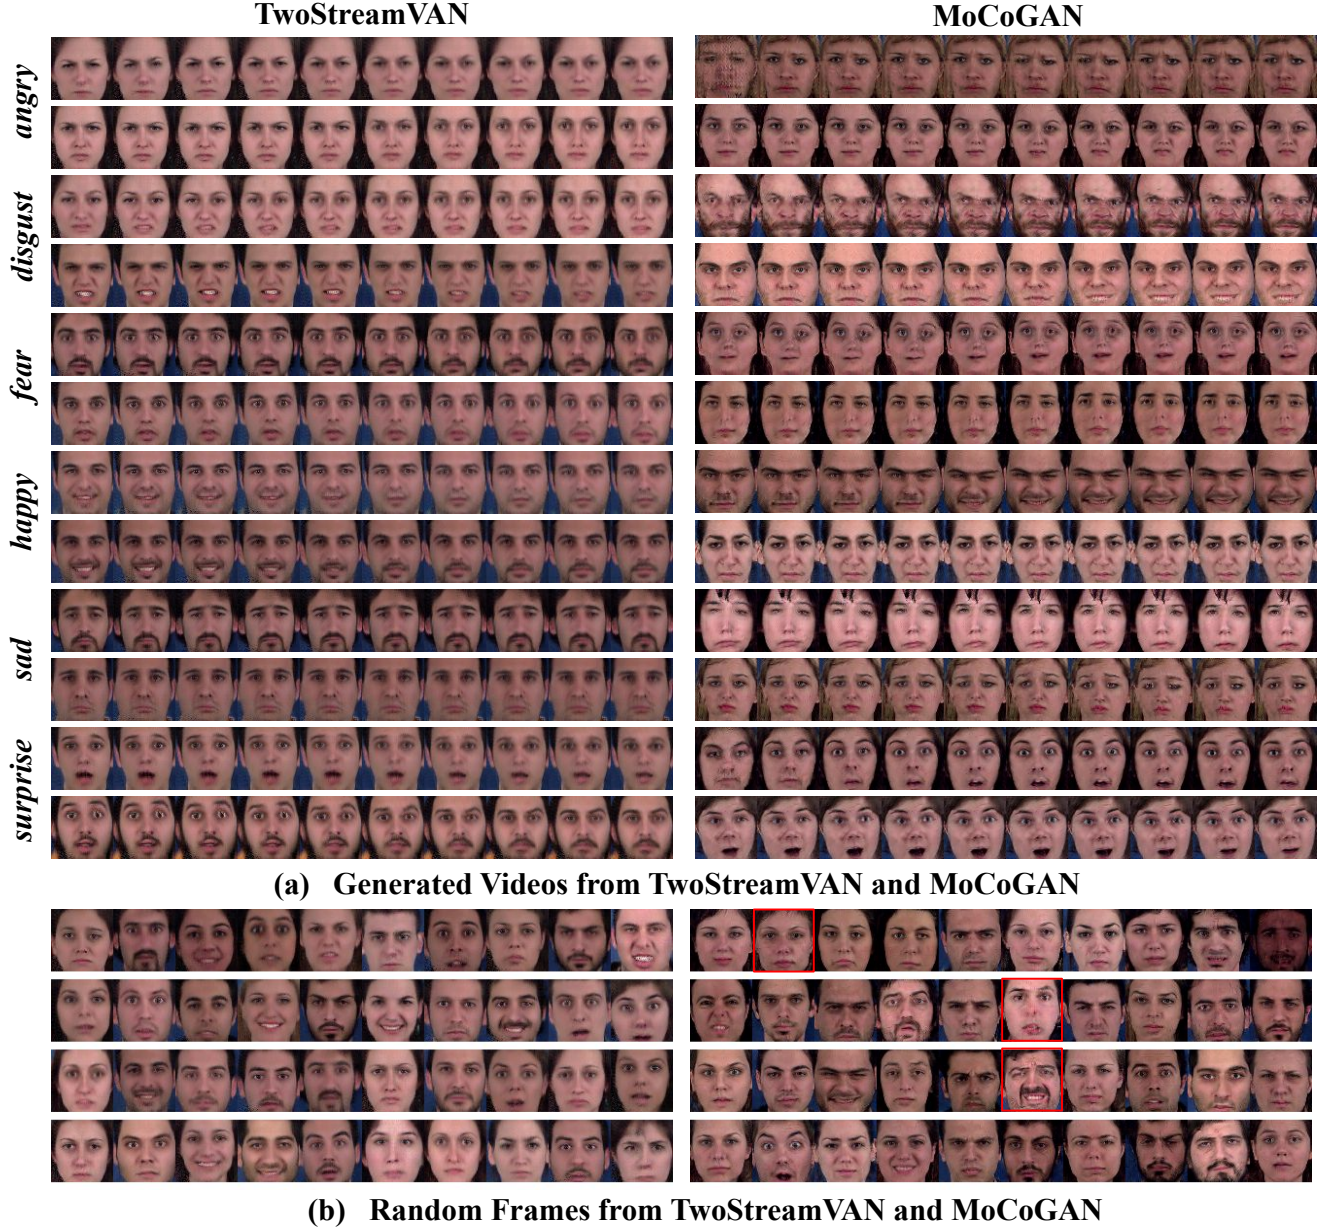

Figure 3: We provide 2 videos of one action class generated by TwoStreamVAN and MoCoGAN respectively on MUG Facial Expression. Also, we randomly sample 40 frames to show the content quality. We mark frames with large distortion in red.

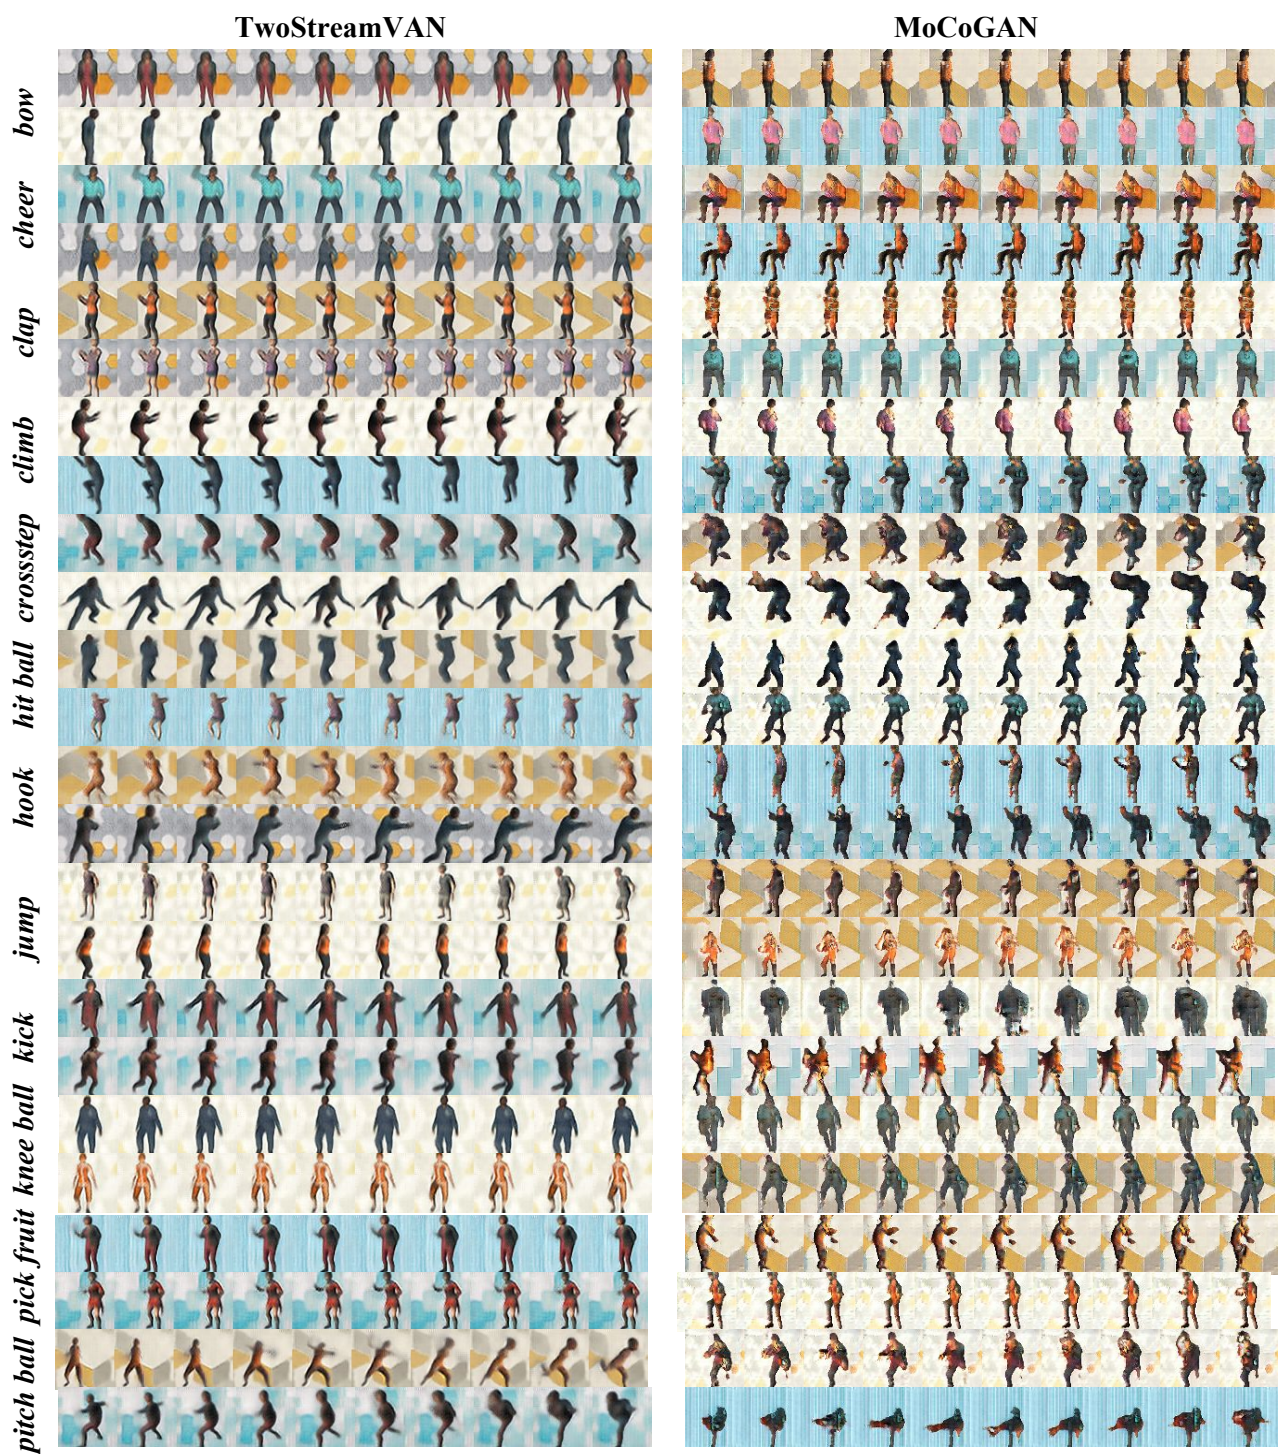

Figure 4: We provide 2 videos of one action class generated by TwoStreamVAN and MoCoGAN respectively on the first 12 classes of SynAction.

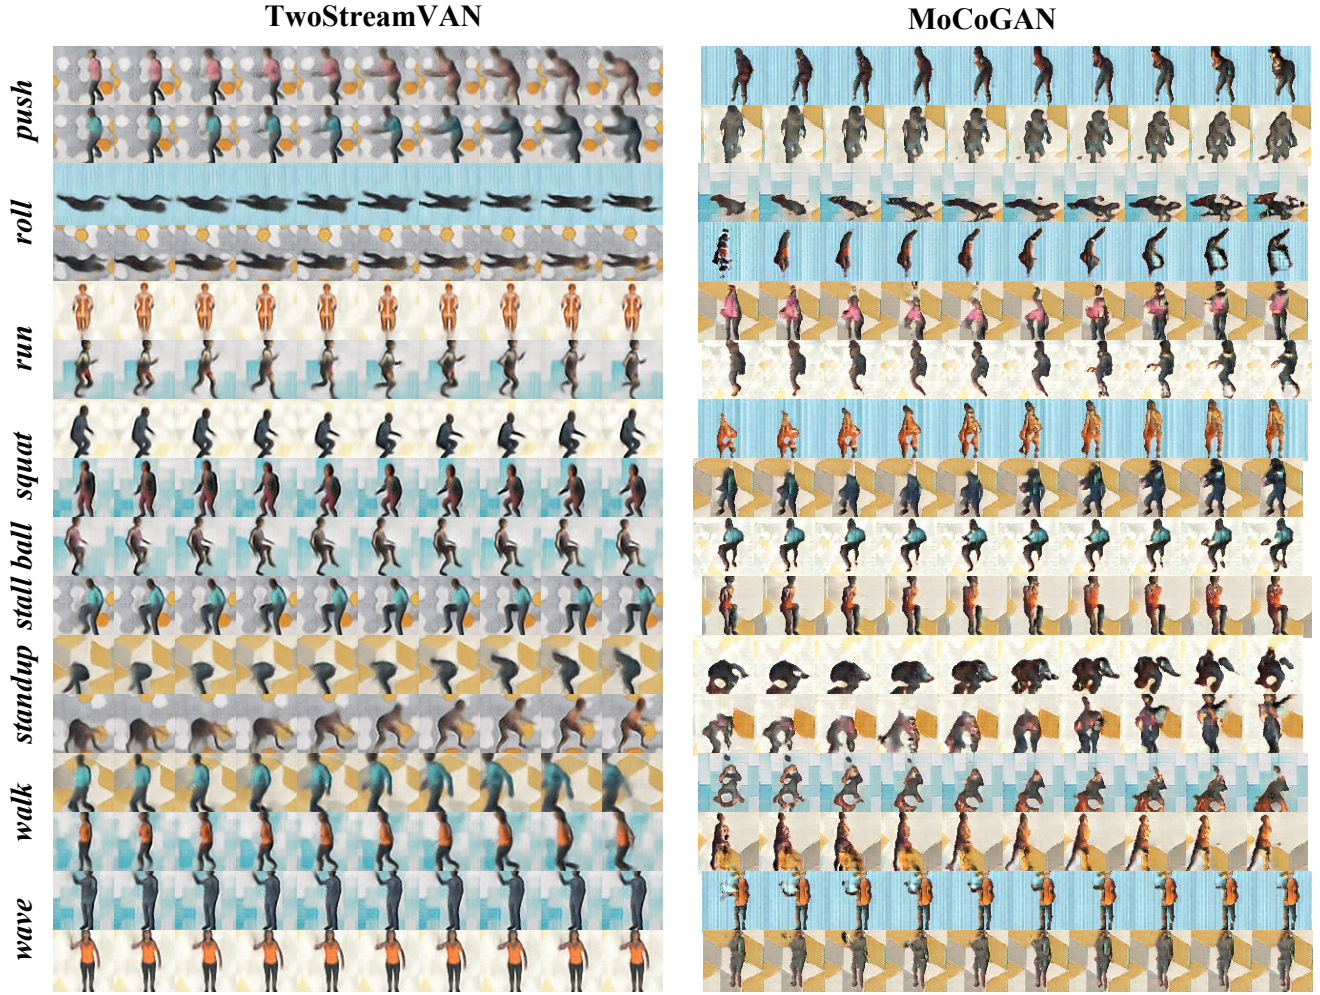

(a) Generated Videos from TwoStreamVAN and MoCoGAN

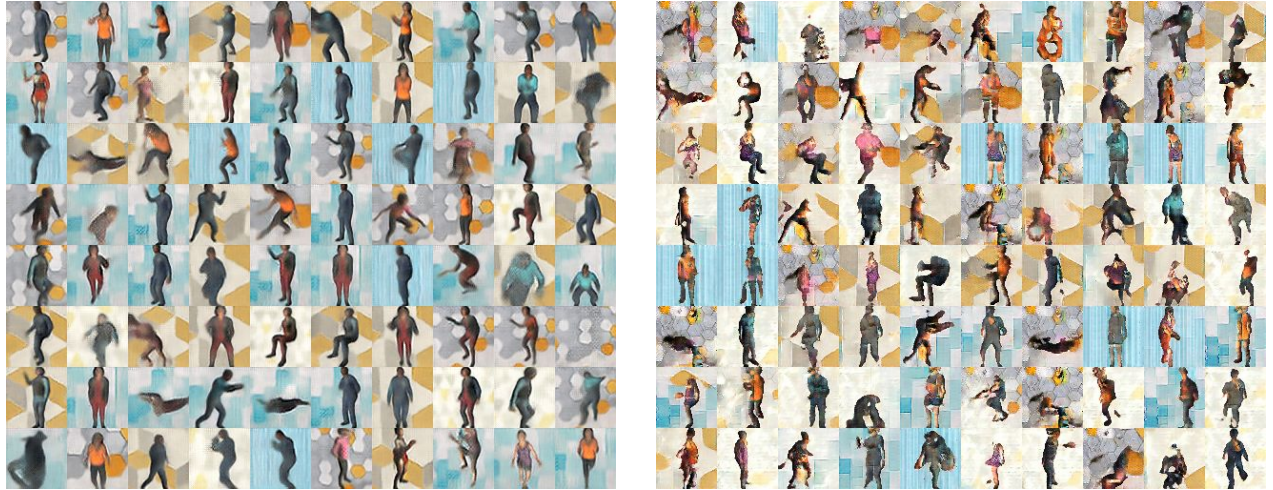

(b) Random Frames from TwoStreamVAN and MoCoGAN

Figure 5: We provide 2 videos of one action class generated by TwoStreamVAN and MoCoGAN respectively on the remaining 8 classes of SynAction. Also, we randomly sample 80 frames to show the content quality.

**TwoStreamVAN**

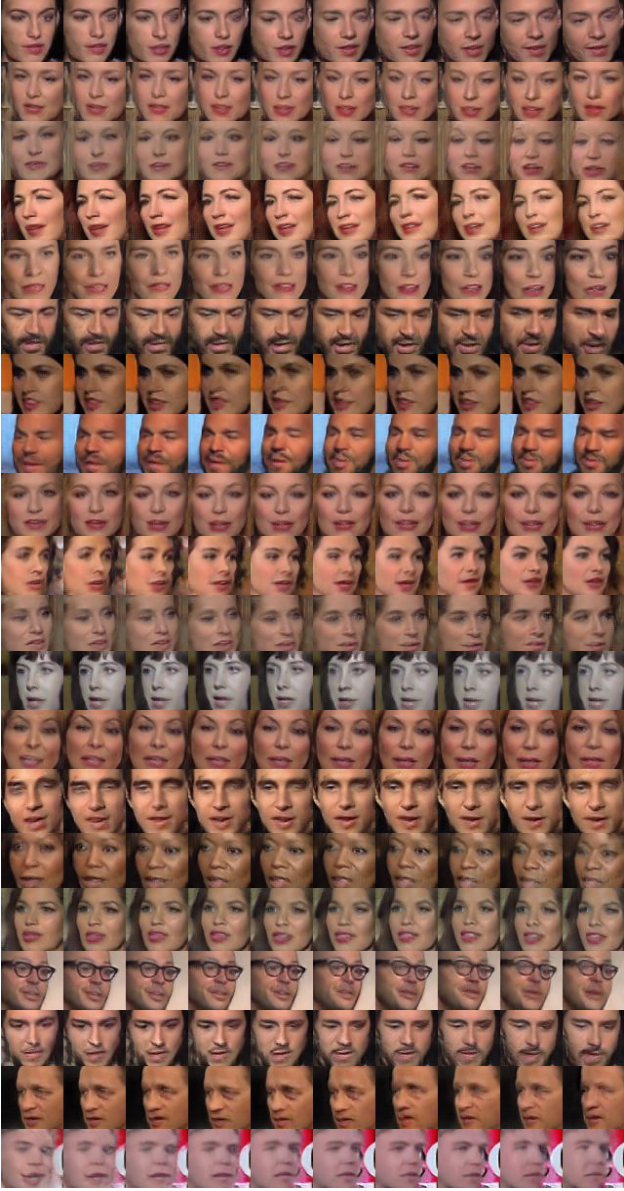

**MoCoGAN**

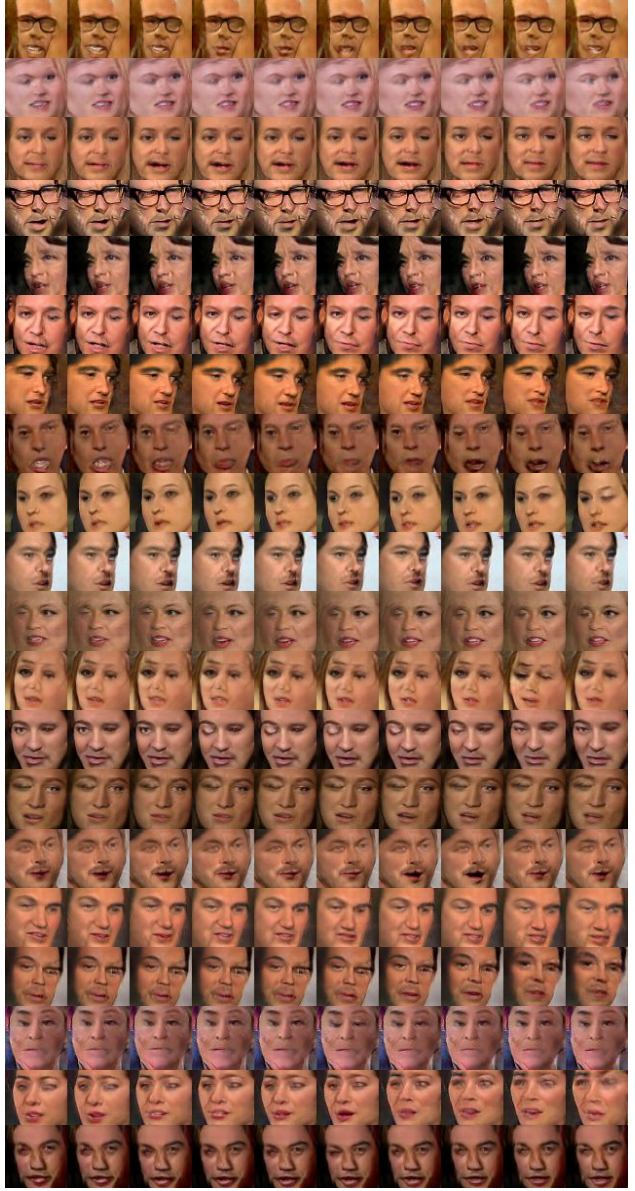

**(a) Generated Videos from TwoStreamVAN and MoCoGAN**

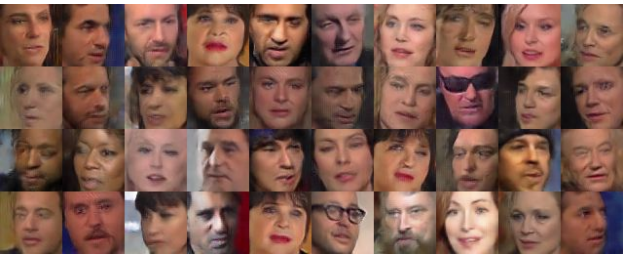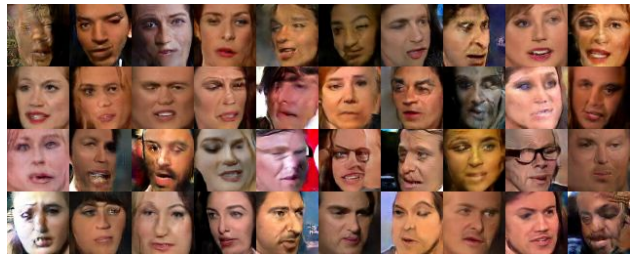

**(b) Random Frames from TwoStreamVAN and MoCoGAN**

Figure 6: We provide 20 videos generated by TwoStreamVAN and MoCoGAN respectively on VoxCeleb. Also, we randomly sample 40 frames to show the content quality.
